# Supplementary material for: Blocking glutamate mGlu5 receptors with the negative allosteric modulator CTEP improves disease course in SOD1G93A mouse model of amyotrophic lateral sclerosis
Source: PubMed Central journal article supplement (PMC8457068; doi:10.1111/bph.15515), 2021-06-29

**Supporting material for Reviewers only**

Supporting material for Reviewers only

(biological replicates used for histological MN counts, in male treated mice at the low dose of CTEP 2mg/kg/48h)

Supporting material at the figure 6

Vehicle-treated WT

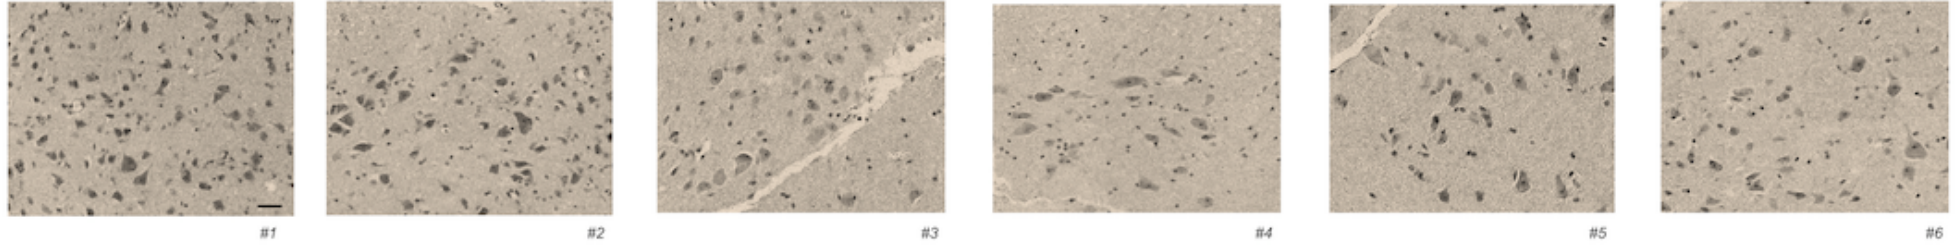

CTEP-treated (2mg/kg) WT

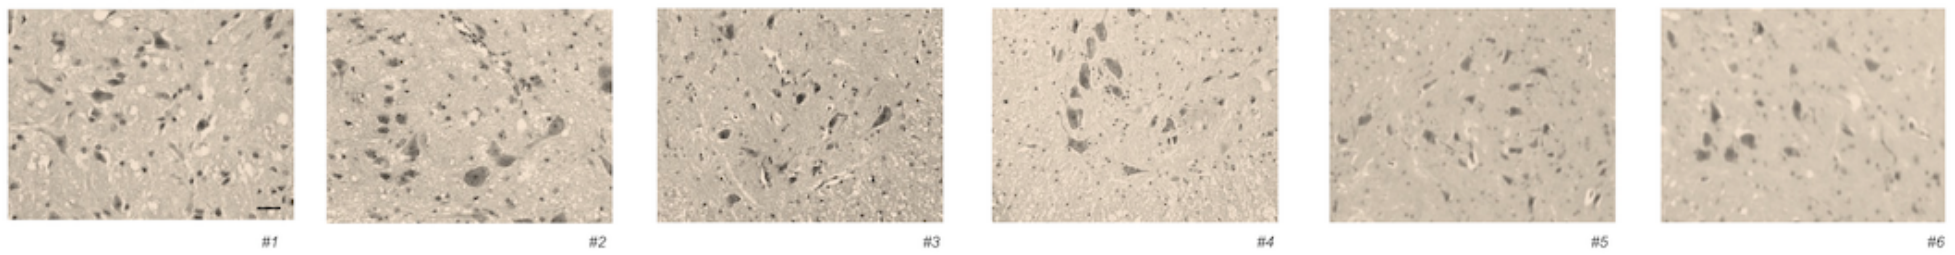

Vehicle-treated SOD1<sup>G93A</sup>

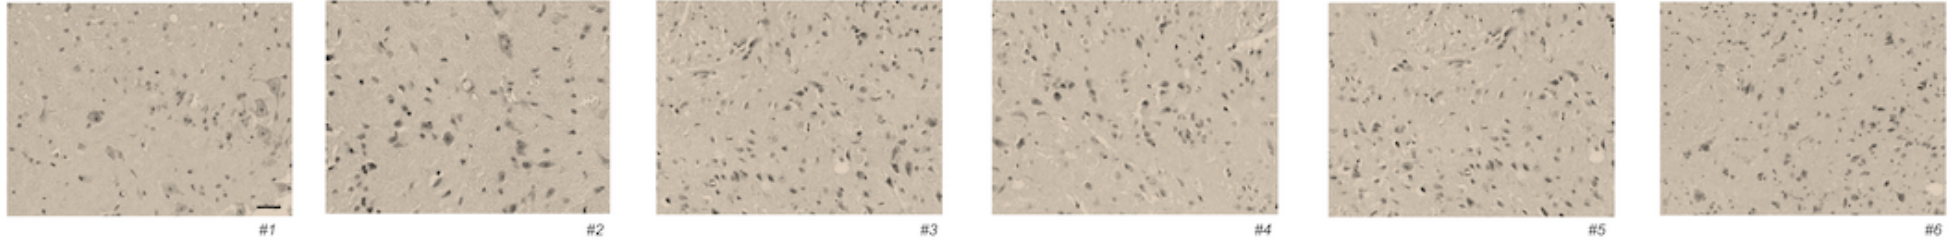

CTEP-treated (2mg/kg) SOD1<sup>G93A</sup>

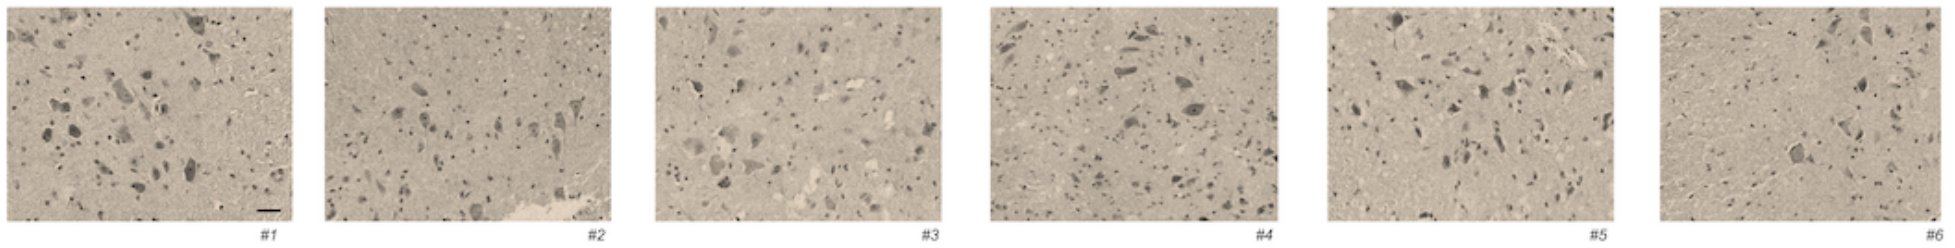

**Supporting material for Reviewers only**

**(biological replicates used for histological MN counts, in female treated mice at the high dose of CTEP 2mg/kg/48h)**

Supporting material at the figure 6

*Vehicle-treated WT*

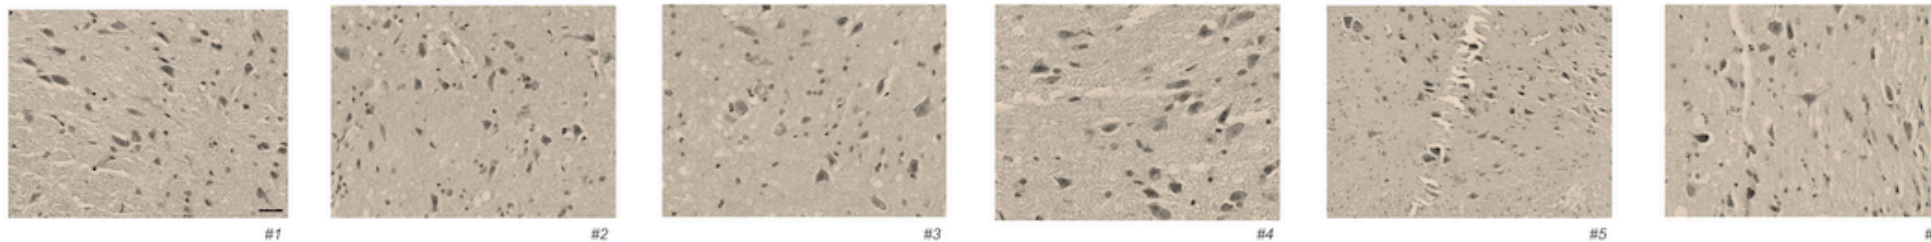

*CTEP-treated (2mg/kg) WT*

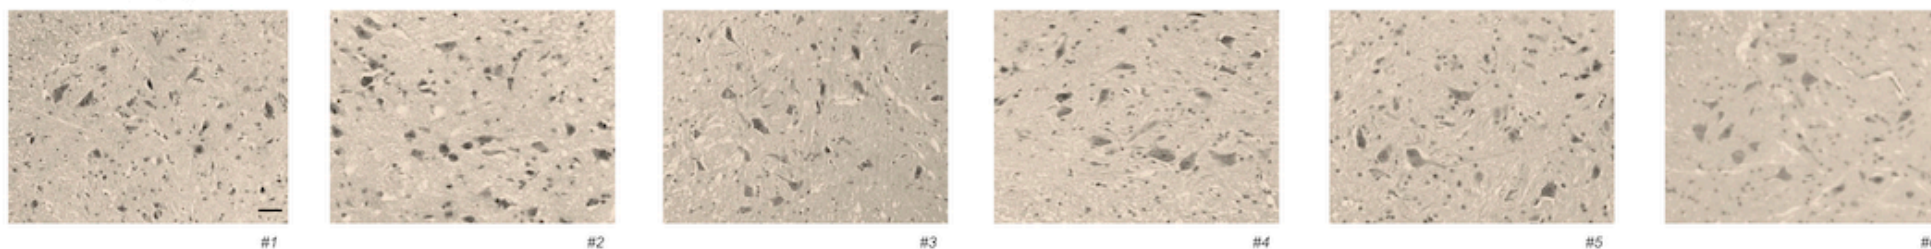

*Vehicle-treated SOD1<sup>G93A</sup>*

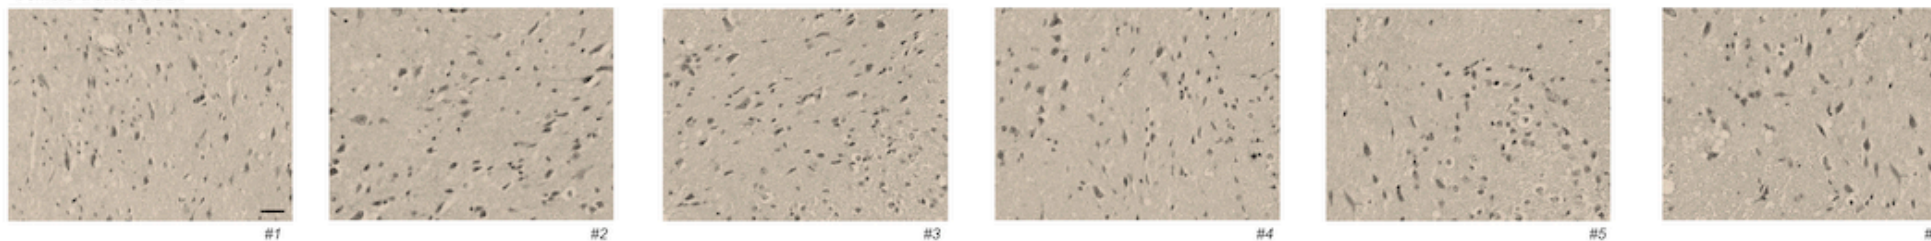

*CTEP-treated (2mg/kg) SOD1<sup>G93A</sup>*

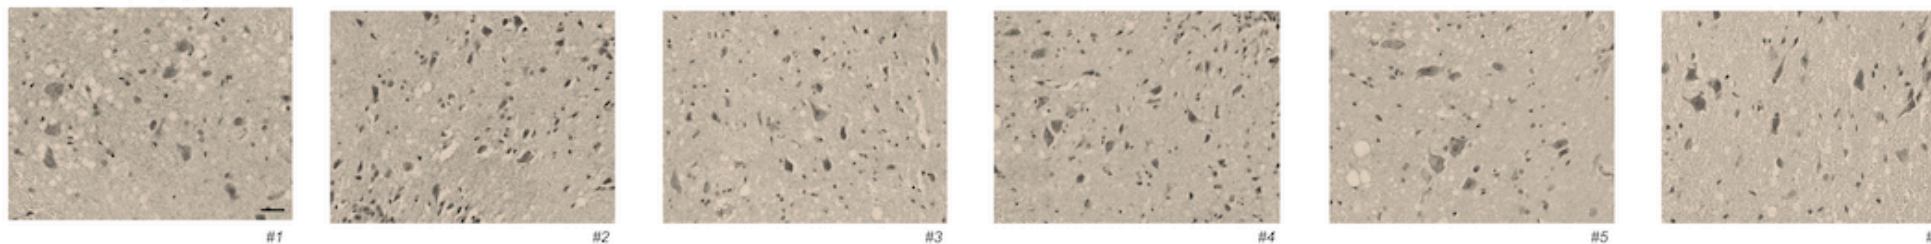

Supporting material for Reviewers only

(biological replicates used for histological MN counts, in male treated mice at the high dose of CTEP 4mg/kg/24h)

Vehicle-treated WT

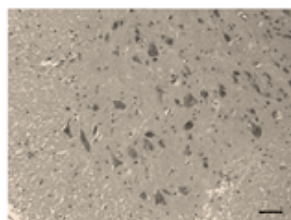

#1

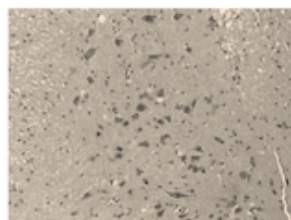

#2

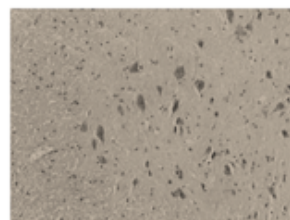

#3

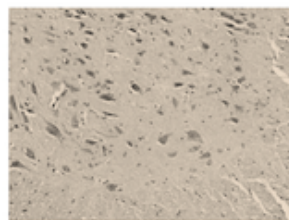

#4

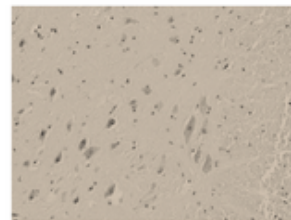

#5

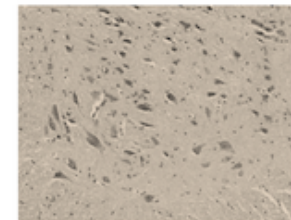

#6

CTEP-treated (4mg/kg) WT

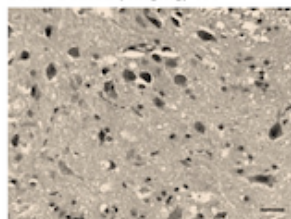

#1

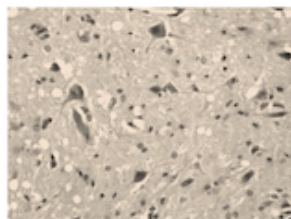

#2

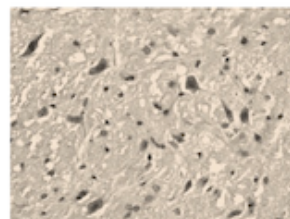

#3

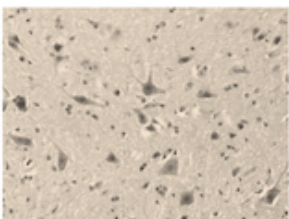

#4

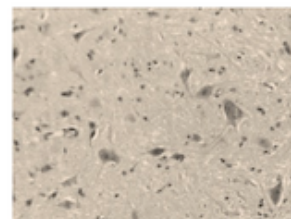

#5

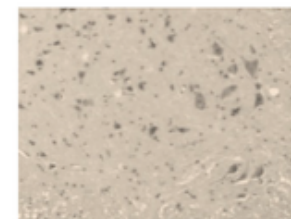

#6

Vehicle-treated SOD1<sup>G93A</sup>

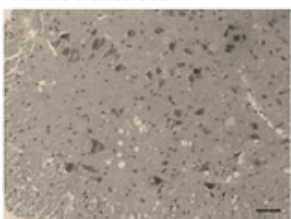

#1

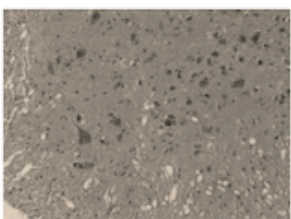

#2

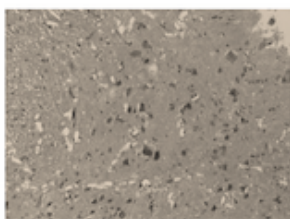

#3

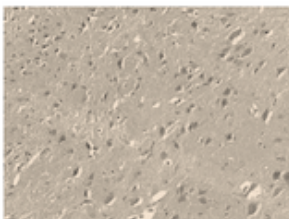

#4

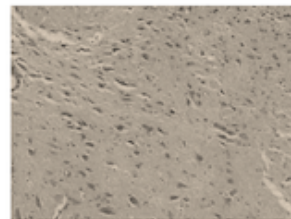

#5

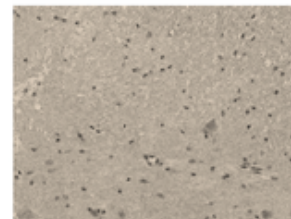

#6

CTEP-treated (4mg/kg) SOD1<sup>G93A</sup>

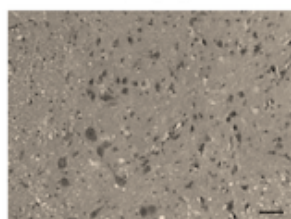

#1

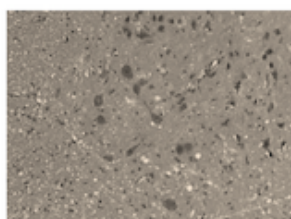

#2

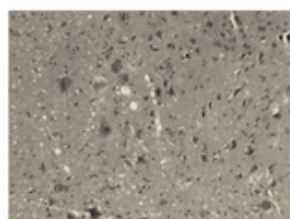

#3

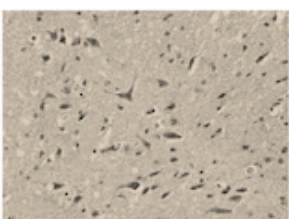

#4

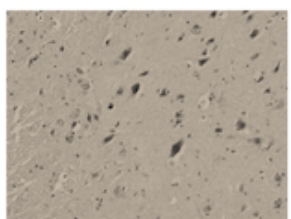

#5

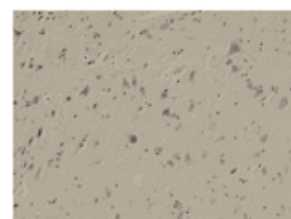

#6

**Supporting material for Reviewers only**

**(biological replicates used for histological MN counts, in female treated mice at the high dose of CTEP 4mg/kg/24h)**

*Vehicle-treated WT*

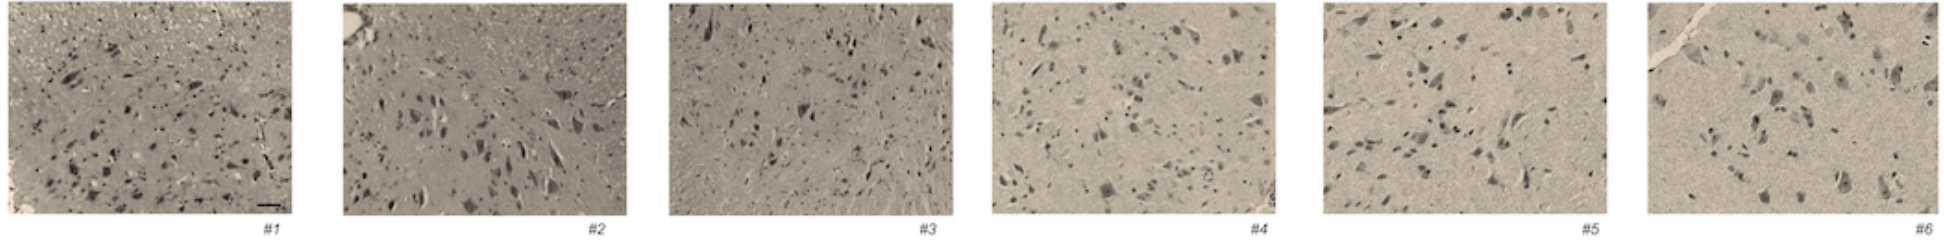

*CTEP-treated (4mg/kg) WT*

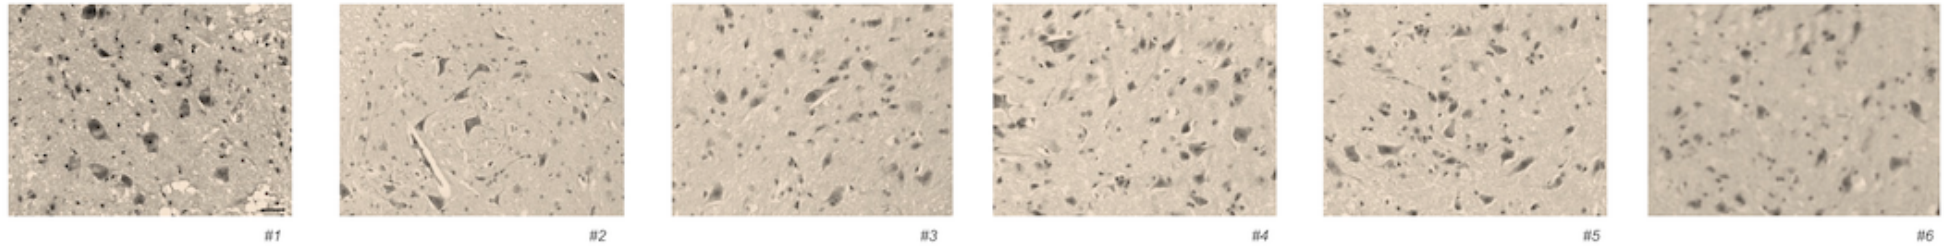

*Vehicle-treated SOD1<sup>G93A</sup>*

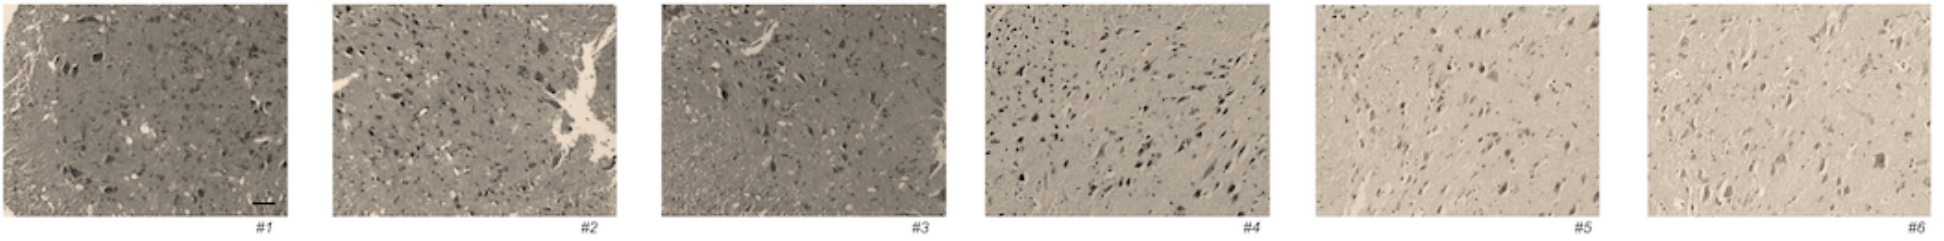

*CTEP-treated (4mg/kg) SOD1<sup>G93A</sup>*

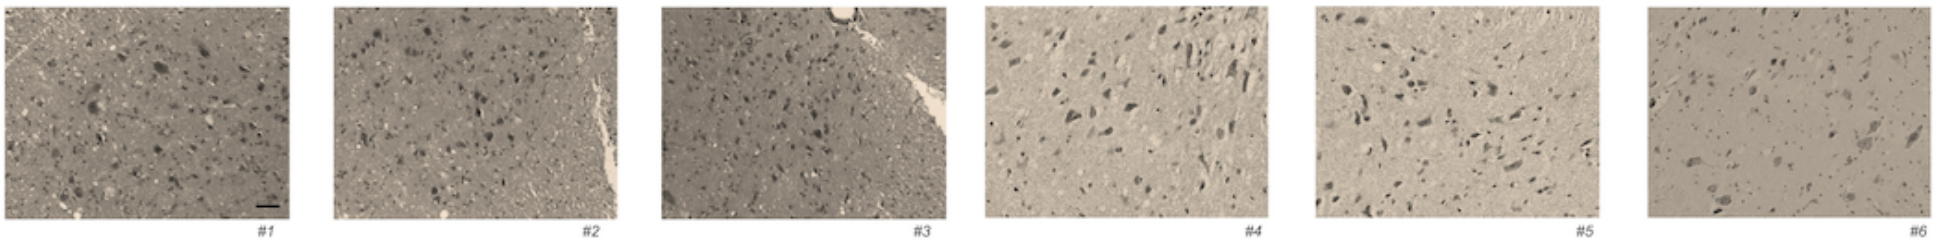

Supporting material for Reviewers only

(biological replicates used for quantification analyses of GFAP immunostaining, in male treated mice at the low dose of CTEP 2mg/kg/48h)

Supporting material at the figure 6

*Vehicle-treated WT*

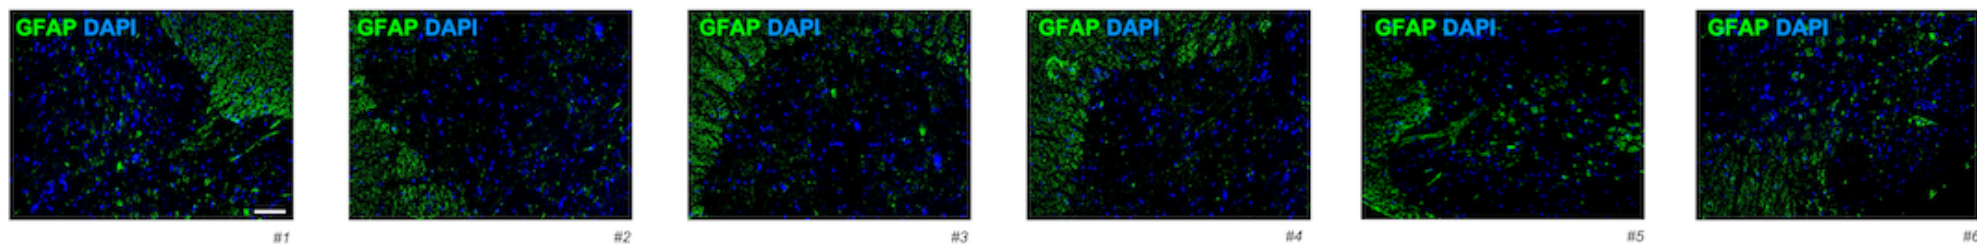

*CTEP-treated (2mg/kg) WT*

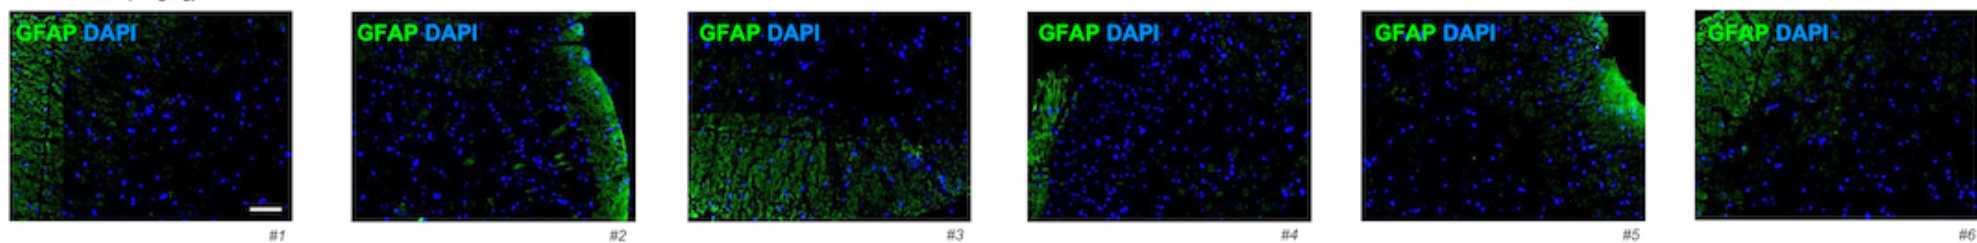

*Vehicle-treated SOD1<sup>G93A</sup>*

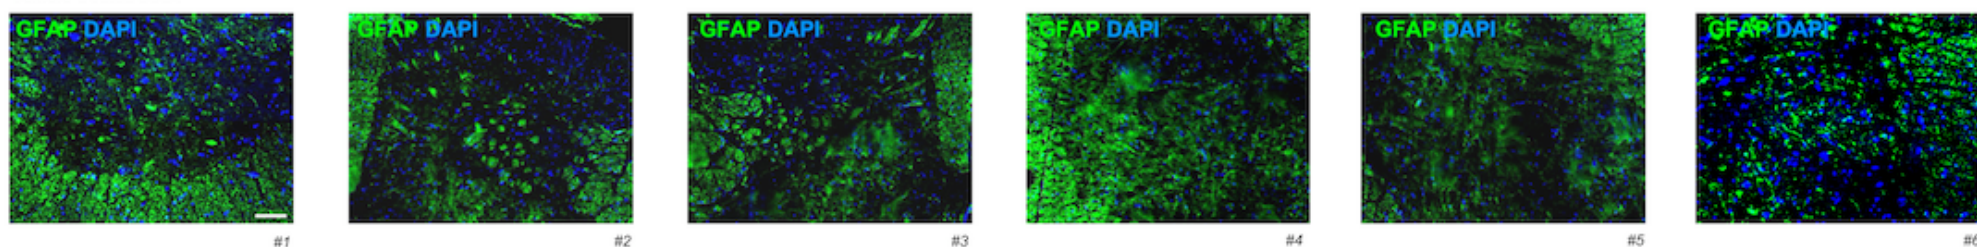

*CTEP-treated (2mg/kg) SOD1<sup>G93A</sup>*

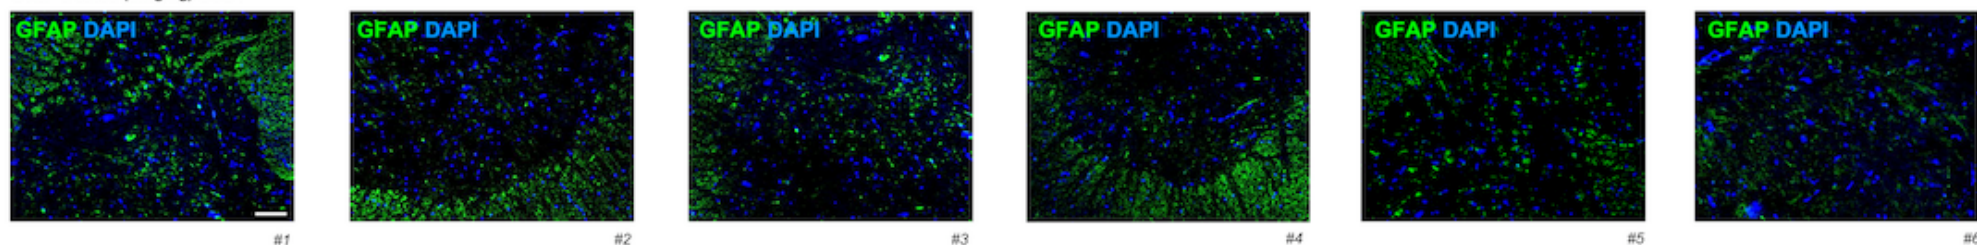

Supporting material for Reviewers only

(biological replicates used for quantification analyses of IBA1 immunostaining, in female treated mice at the low dose of CTEP 2mg/kg/48h)

Supporting material at the figure 6

Vehicle-treated WT

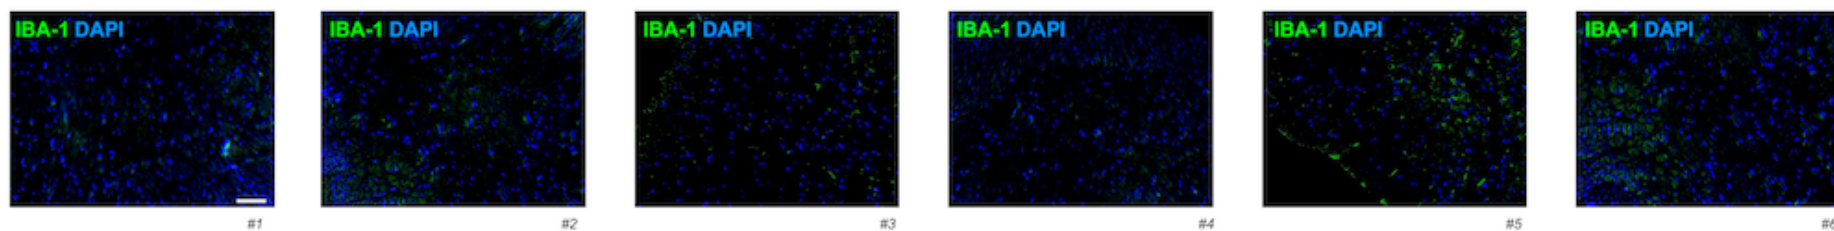

CTEP-treated (2mg/kg) WT

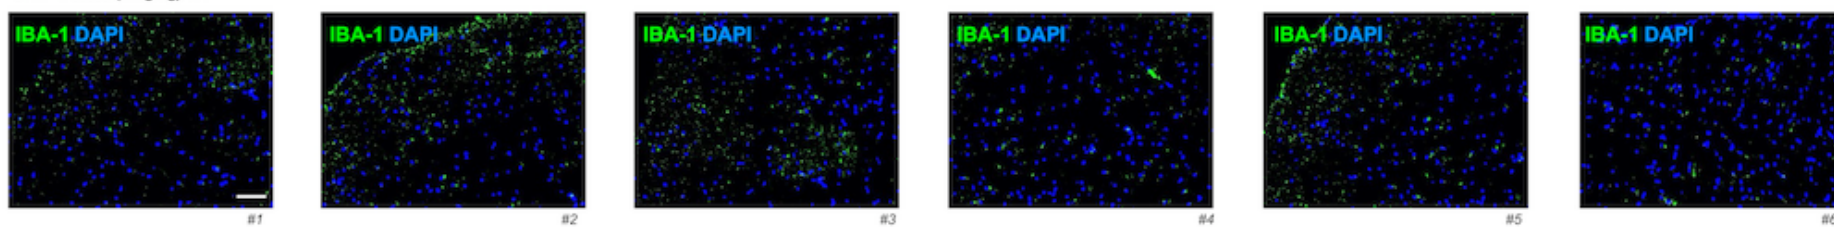

Vehicle-treated SOD1<sup>G93A</sup>

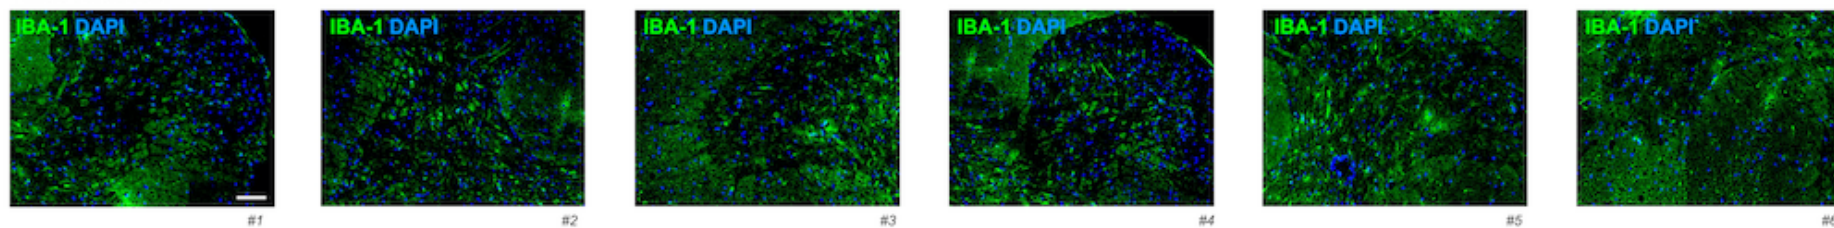

CTEP-treated (2mg/kg) SOD1<sup>G93A</sup>

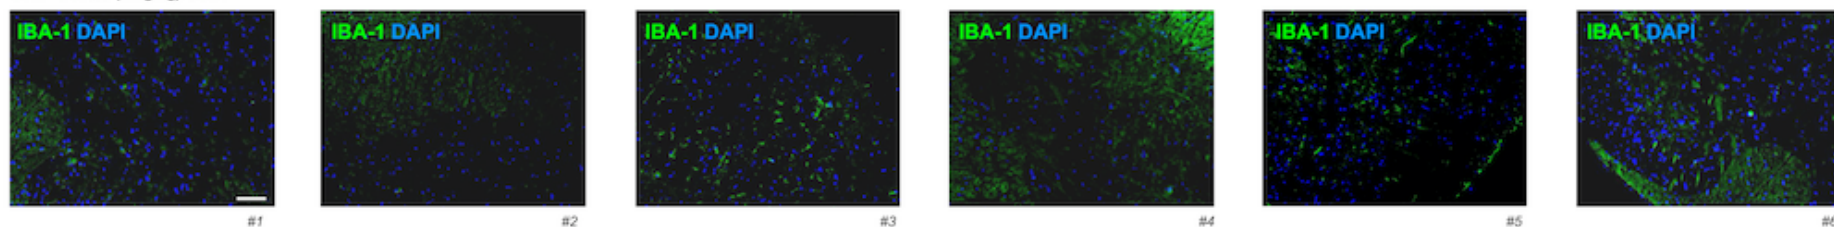

Supporting material for Reviewers only

(biological replicates used for quantification analyses of GFAP immunostaining, in male treated mice at the high dose of CTEP 4mg/kg/24h)

Supporting material at the figure 6

Vehicle-treated WT

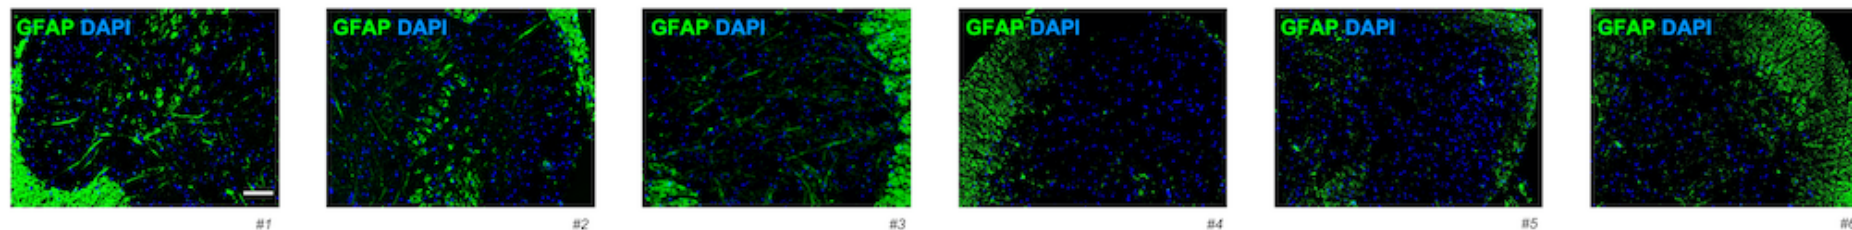

CTEP-treated (4mg/kg) WT

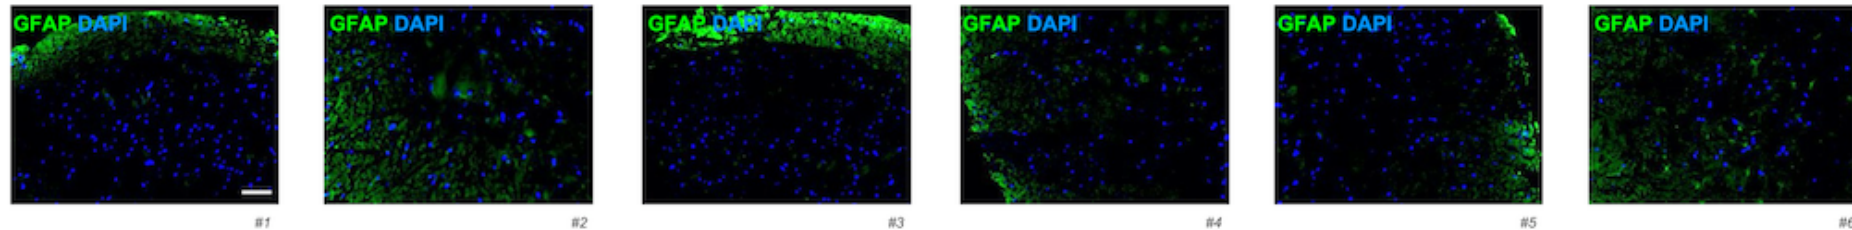

Vehicle-treated SOD1<sup>G93A</sup>

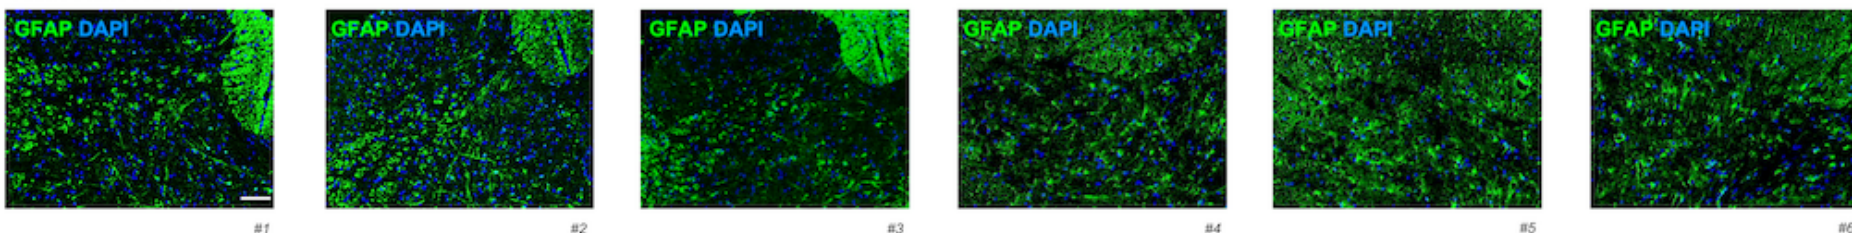

CTEP-treated (4mg/kg) SOD1<sup>G93A</sup>

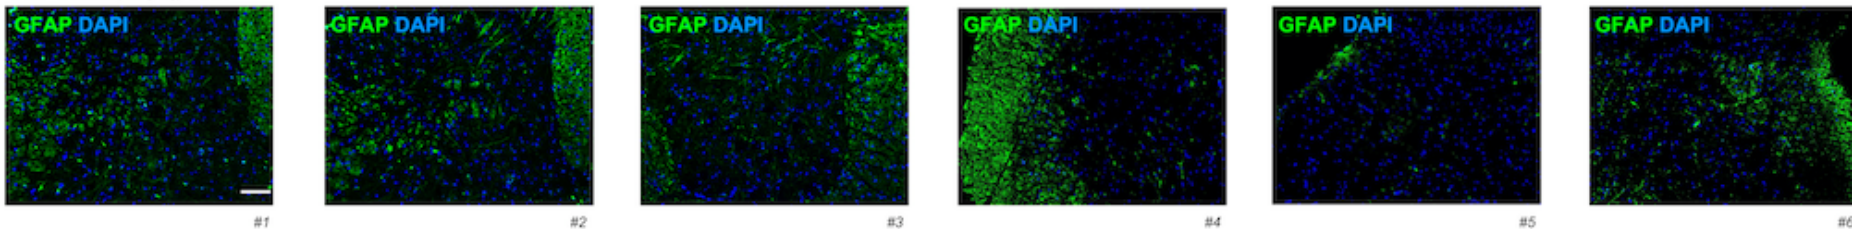



Supporting material for Reviewers only

(biological replicates used for quantification analyses of GFAP immunostaining, in female treated mice at the high dose of CTEP 4mg/kg/24h)

Supporting material at the figure 6

Vehicle-treated WT

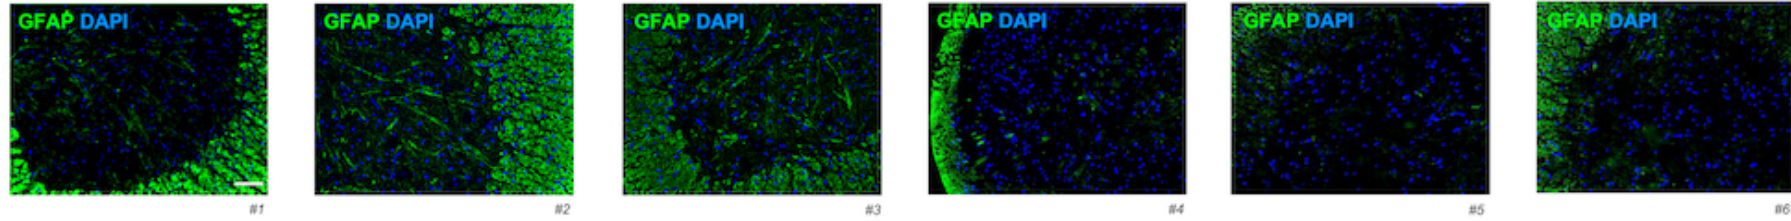

CTEP-treated (4mg/kg) WT

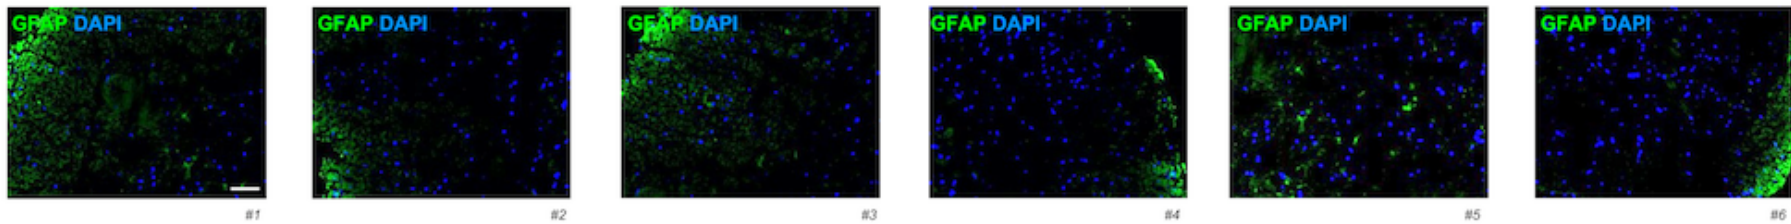

Vehicle-treated SOD1<sup>G93A</sup>

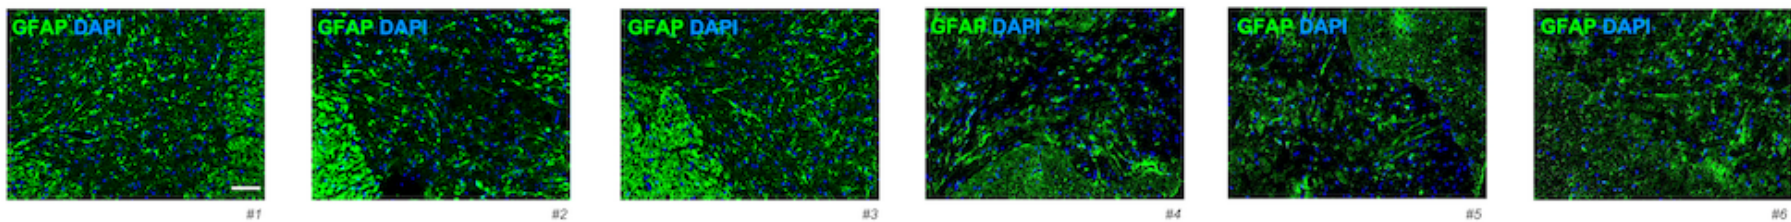

CTEP-treated (4mg/kg) SOD1<sup>G93A</sup>

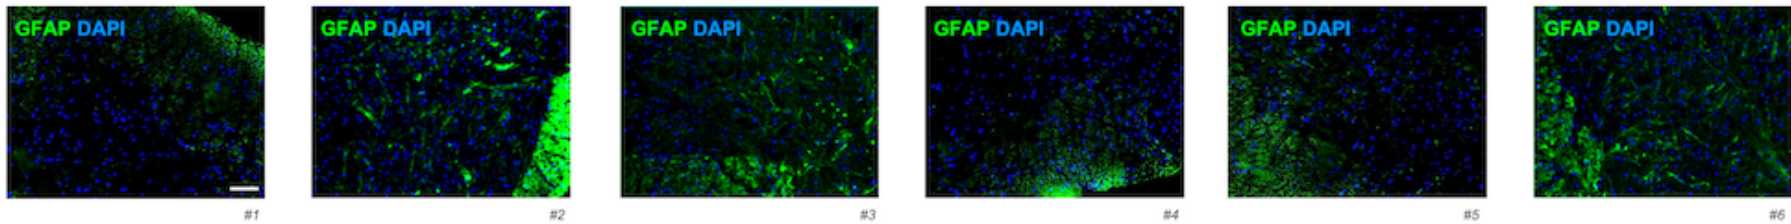

Supporting material for Reviewers only

(biological replicates used for quantification analyses of IBA1 immunostaining, in male treated mice at the low dose of CTEP 2mg/kg/48h)

Supporting material at the figure 6

Vehicle-treated WT

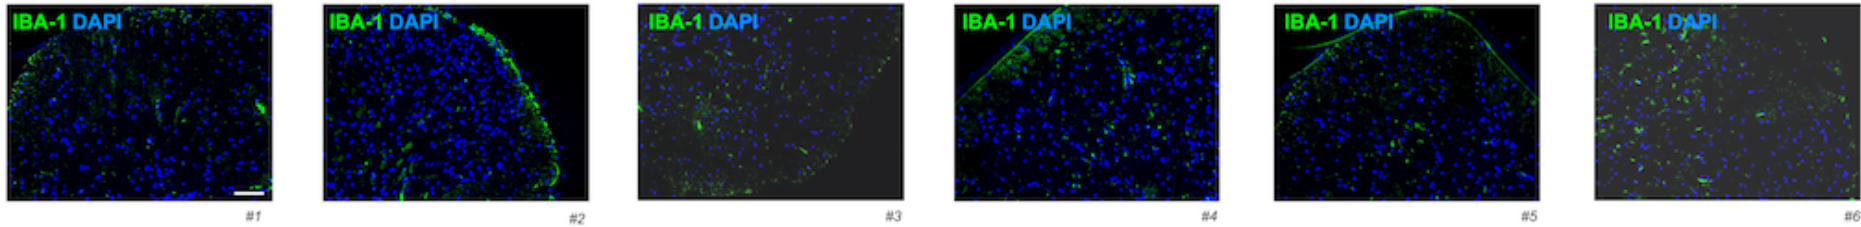

CTEP-treated (2mg/kg) WT

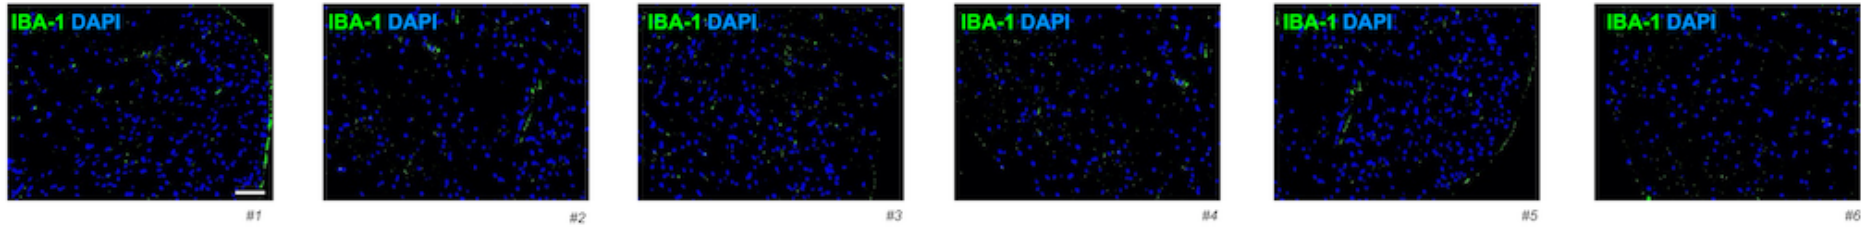

Vehicle-treated SOD1<sup>G93A</sup>

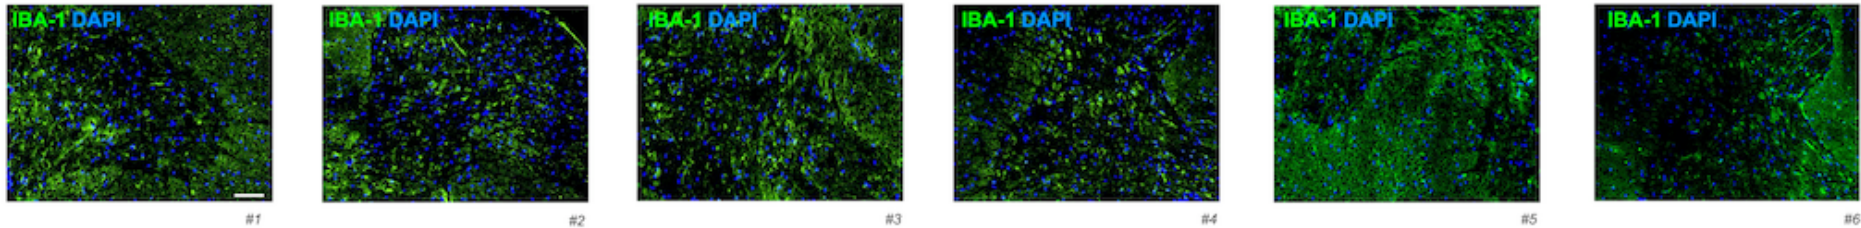

CTEP-treated (4mg/kg) SOD1<sup>G93A</sup>

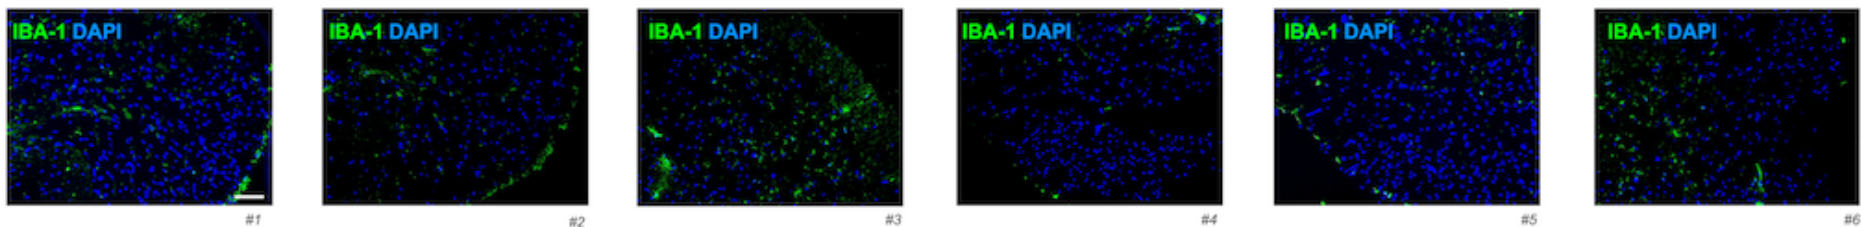

Supporting material for Reviewers only

(biological replicates used for quantification analyses of IBA1 immunostaining, in female treated mice at the low dose of CTEP 2mg/kg/48h)

Supporting material at the figure 6

Vehicle-treated WT

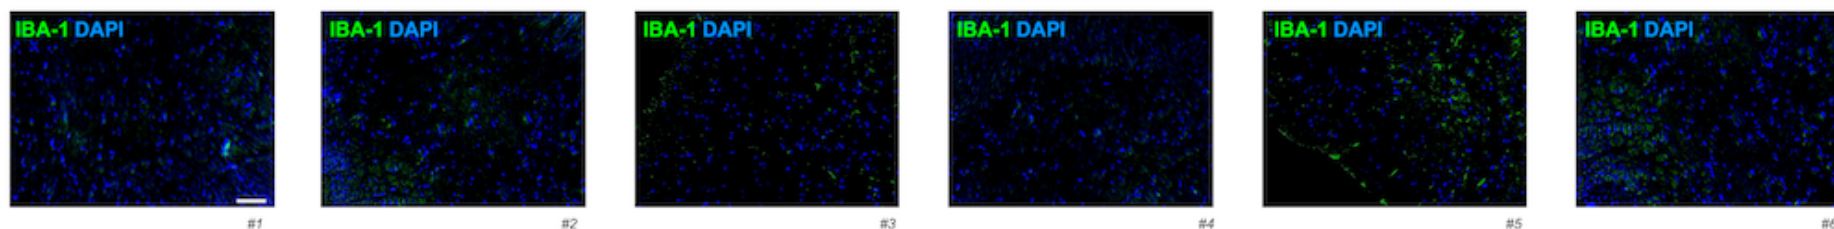

CTEP-treated (2mg/kg) WT

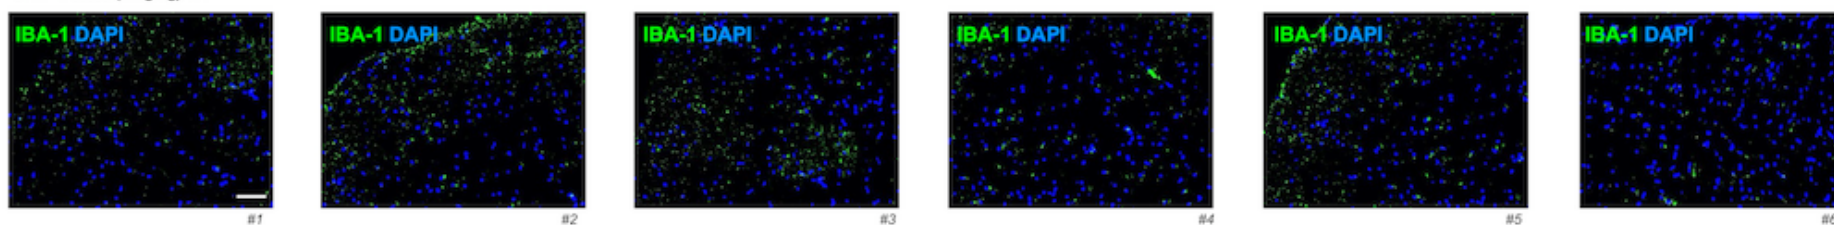

Vehicle-treated SOD1<sup>G93A</sup>

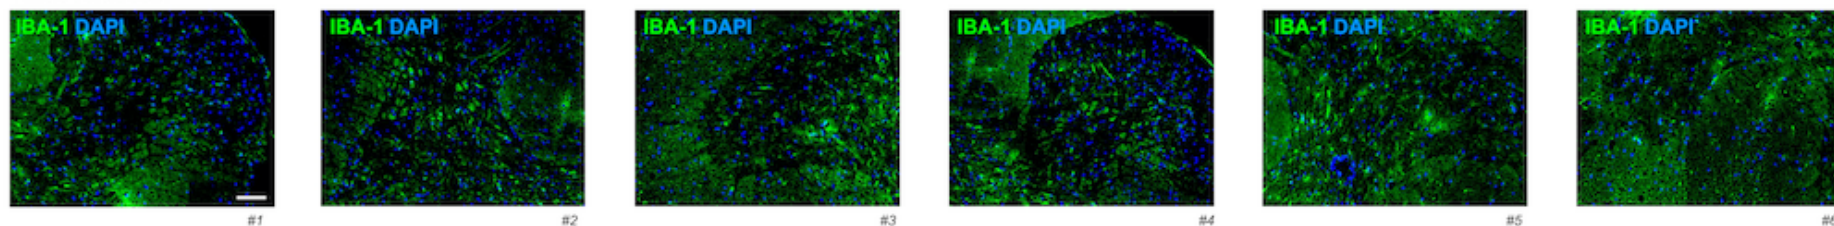

CTEP-treated (2mg/kg) SOD1<sup>G93A</sup>



Supporting material for Reviewers only

(biological replicates used for quantification analyses of IBA1 immunostaining, in male treated mice at the high dose of CTEP 4mg/kg/24h)

Supporting material at the figure 6

Vehicle-treated WT

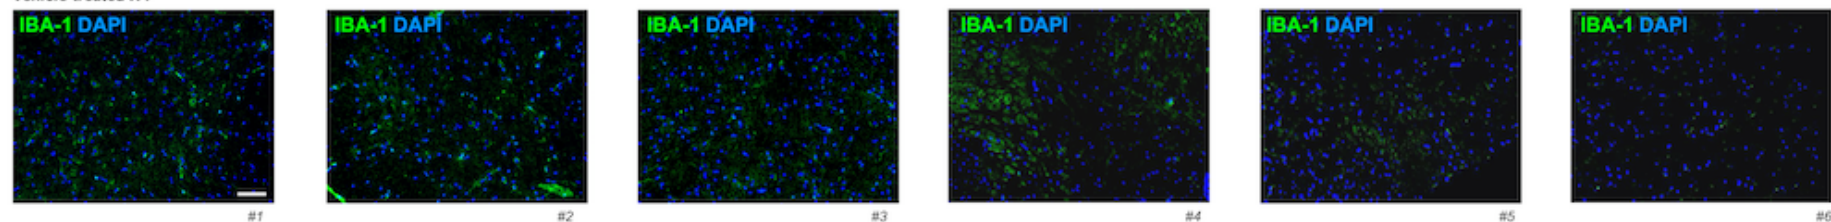

CTEP-treated (4mg/kg) WT

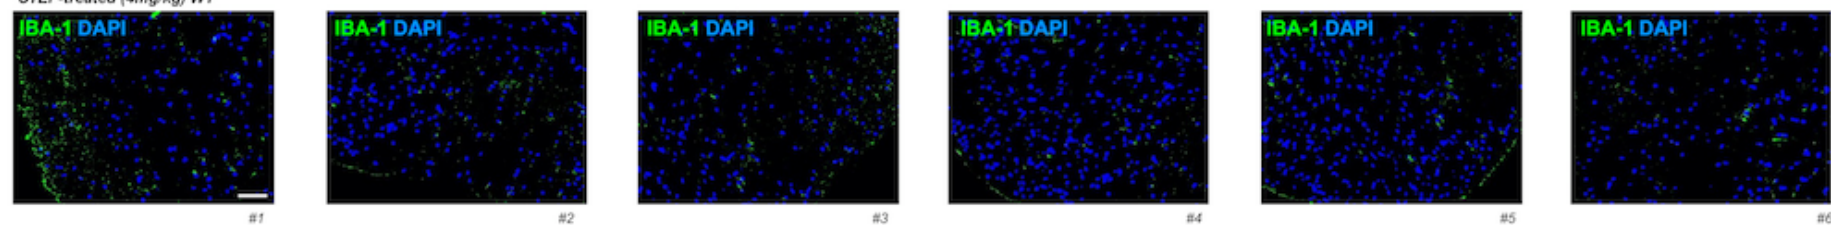

Vehicle-treated SOD1<sup>G93A</sup>

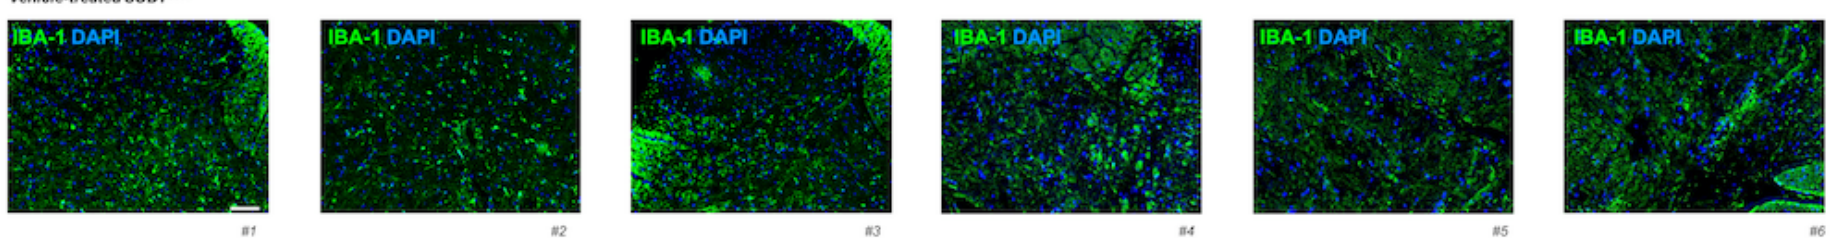

CTEP-treated (4mg/kg) SOD1<sup>G93A</sup>

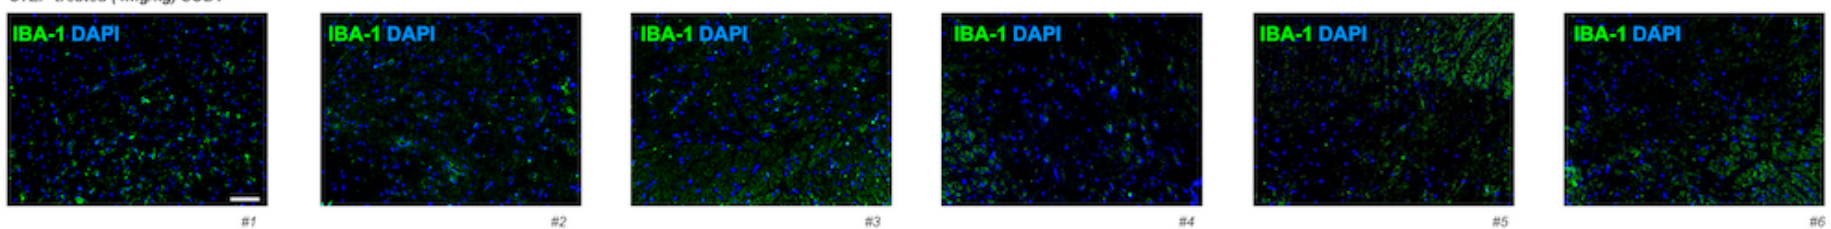

Supporting material for Reviewers only

(biological replicates used for quantification analyses of IBA1 immunostaining, in female treated mice at the high dose of CTEP 4mg/kg/24h)

Vehicle-treated WT

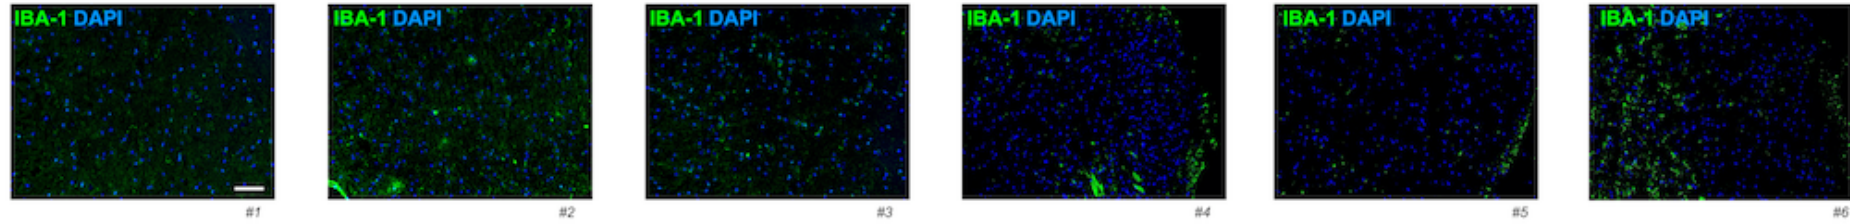

CTEP-treated (4mg/kg) WT

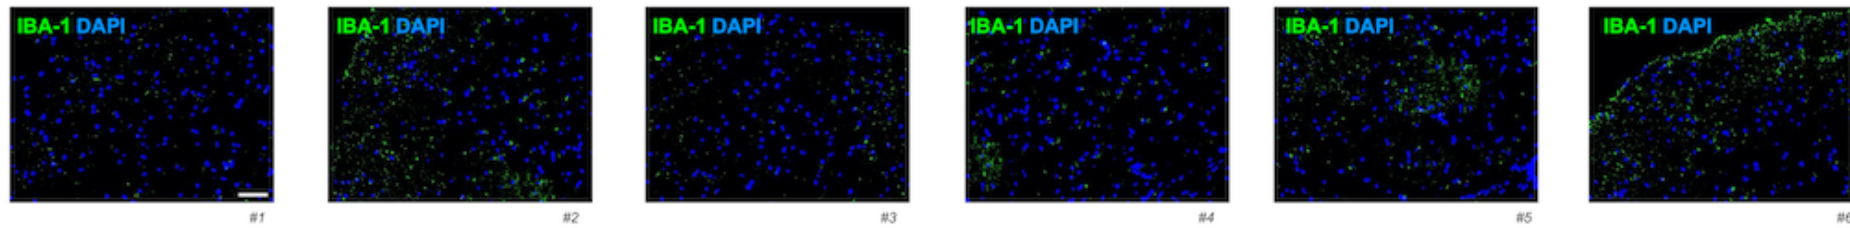

Vehicle-treated SOD1<sup>G93A</sup>

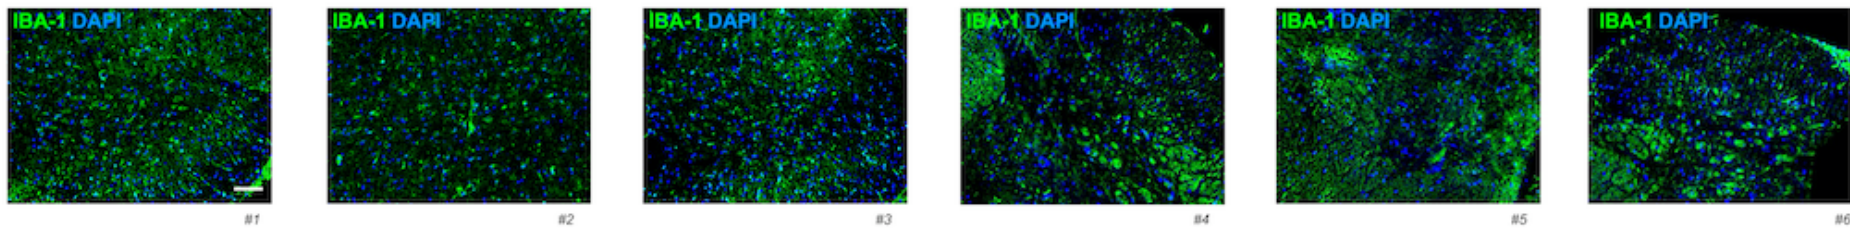

CTEP-treated (4mg/kg) SOD1<sup>G93A</sup>

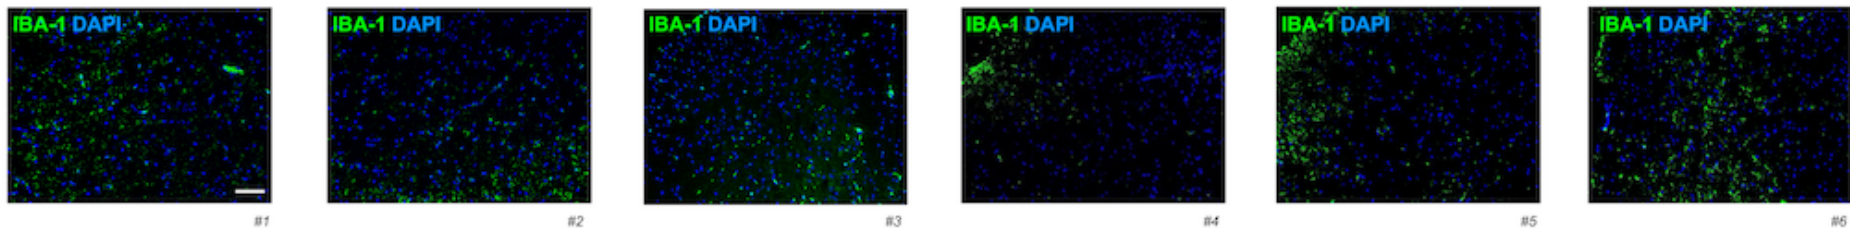

Supplement: BPH-178-3747-s003.pdf [file BPH-178-3747-s003.pdf]
